# Supplementary material for: Titanium aminophosphates: synthesis, characterization and orange G dye degradation studies
Source: Royal Society of Chemistry journal article supplement (doi:10.1039/c5ra19117c), 2015-01-01
Supplement: c5ra19117c1.pdf [file c5ra19117c1.pdf]

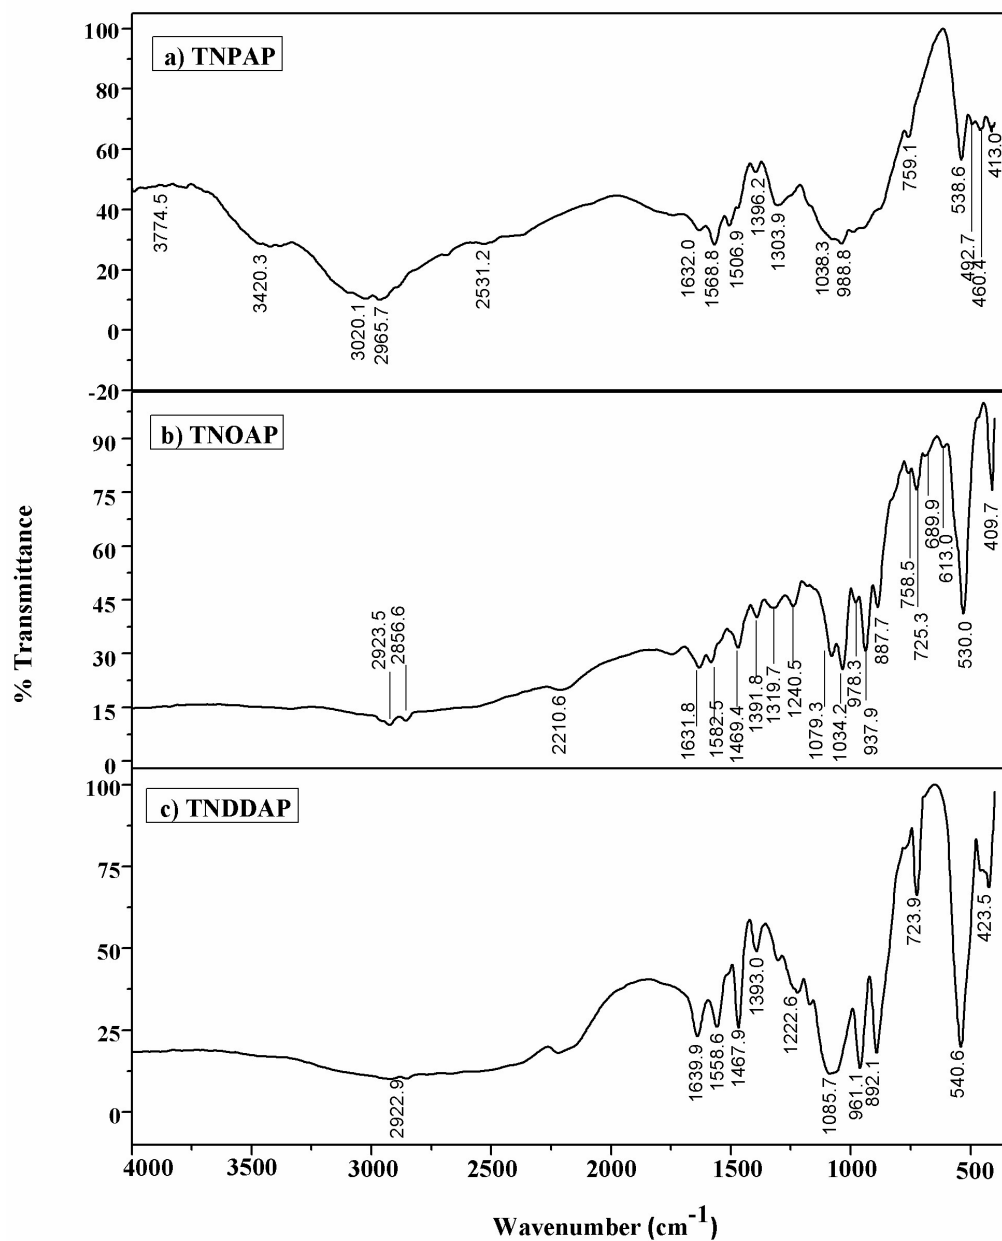

**Fig. 1:** Fourier transform Infra red of a) TNPAP, b) TNOAP and c) TNDDAP.

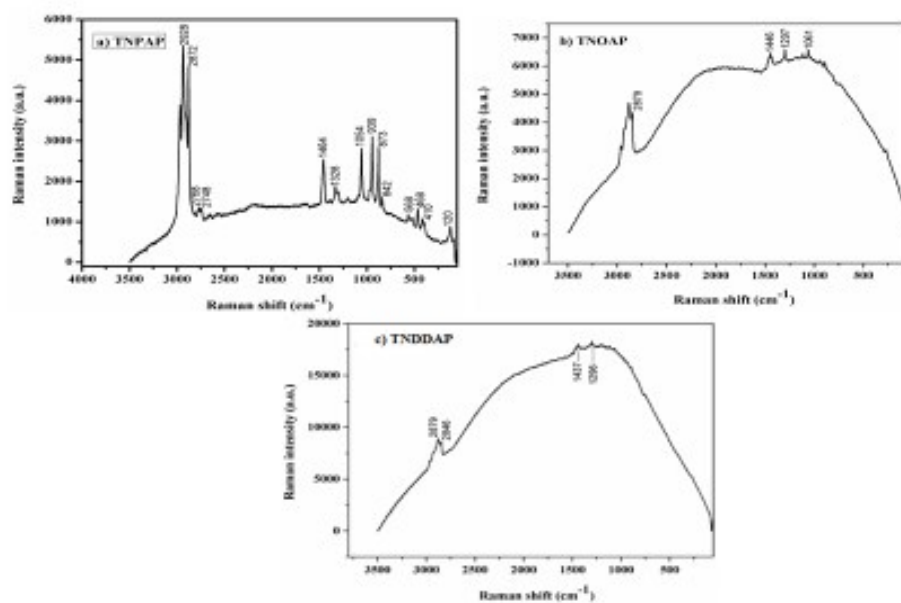

Fig. 2: Dispersive Raman spectra of a) TNPAP, b) TNOAP and c) TNDDAP.
